# Supplementary material for: Curved atmospheric rivers and their moisture remnants: a new detection tool for Antarctica
Source: Copernicus journal article supplement (doi:10.5194/egusphere-2025-6365), 2026-01-09
Supplement: Supplementary file 1 [file egusphere-2025-6365-supplement.pdf]

Supplement

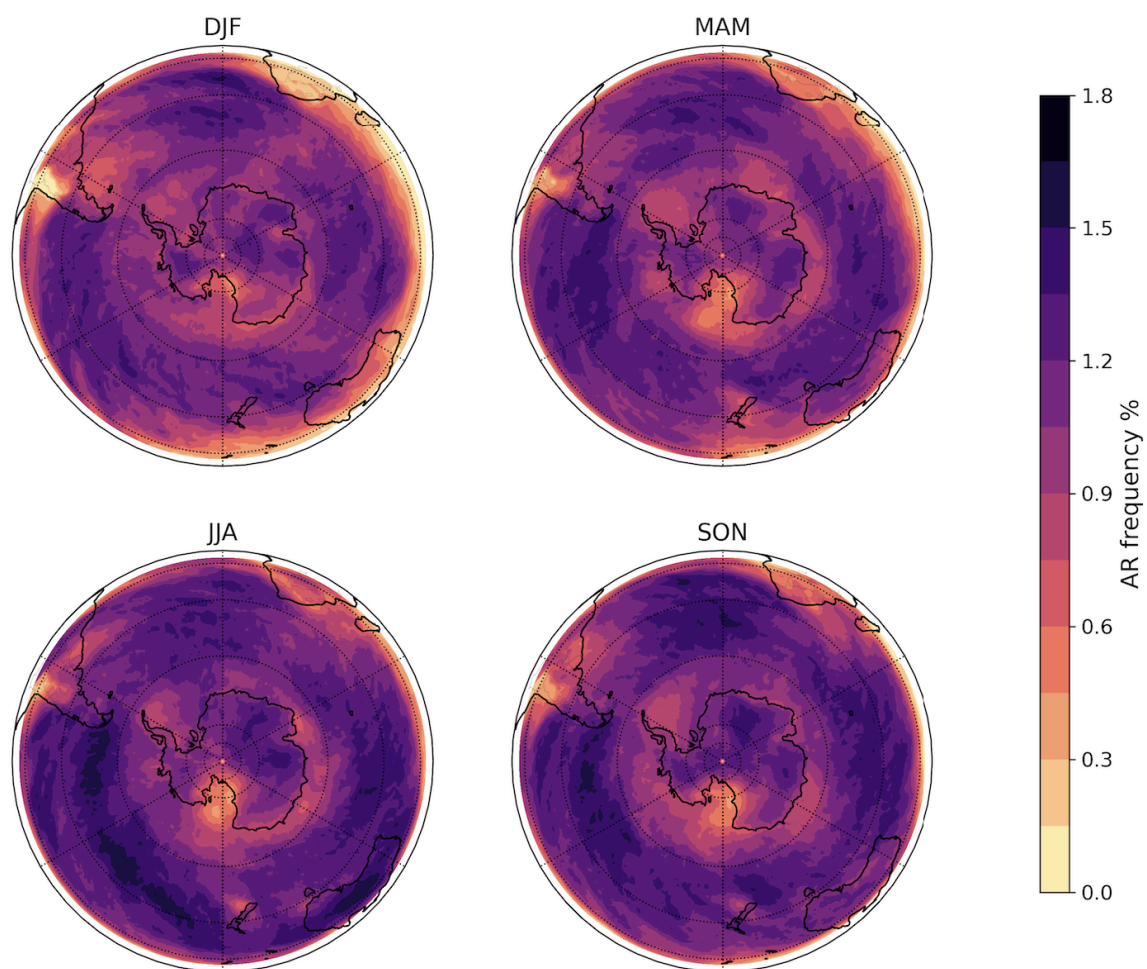

**Fig. S1.** Seasonal frequency of DARK ARs for all four austral seasons (DJF, MAM, JJA, SON).

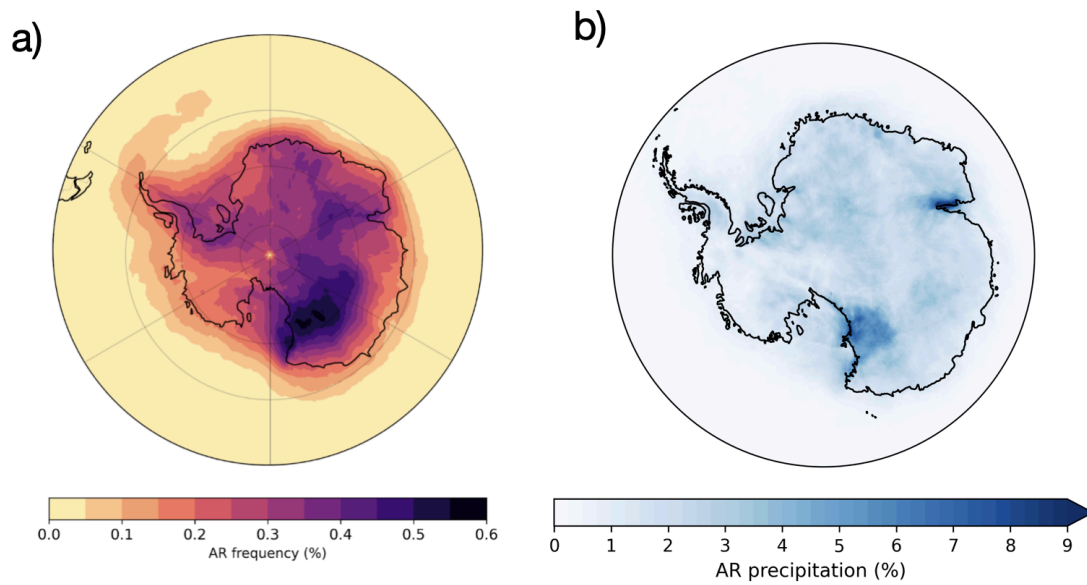

**Fig. S2.** (a) Frequency of DARK AR-children (similar to **Fig. 2**). (b) Share of total precipitation attributed to DARK AR-children (similar to **Fig. 4**).

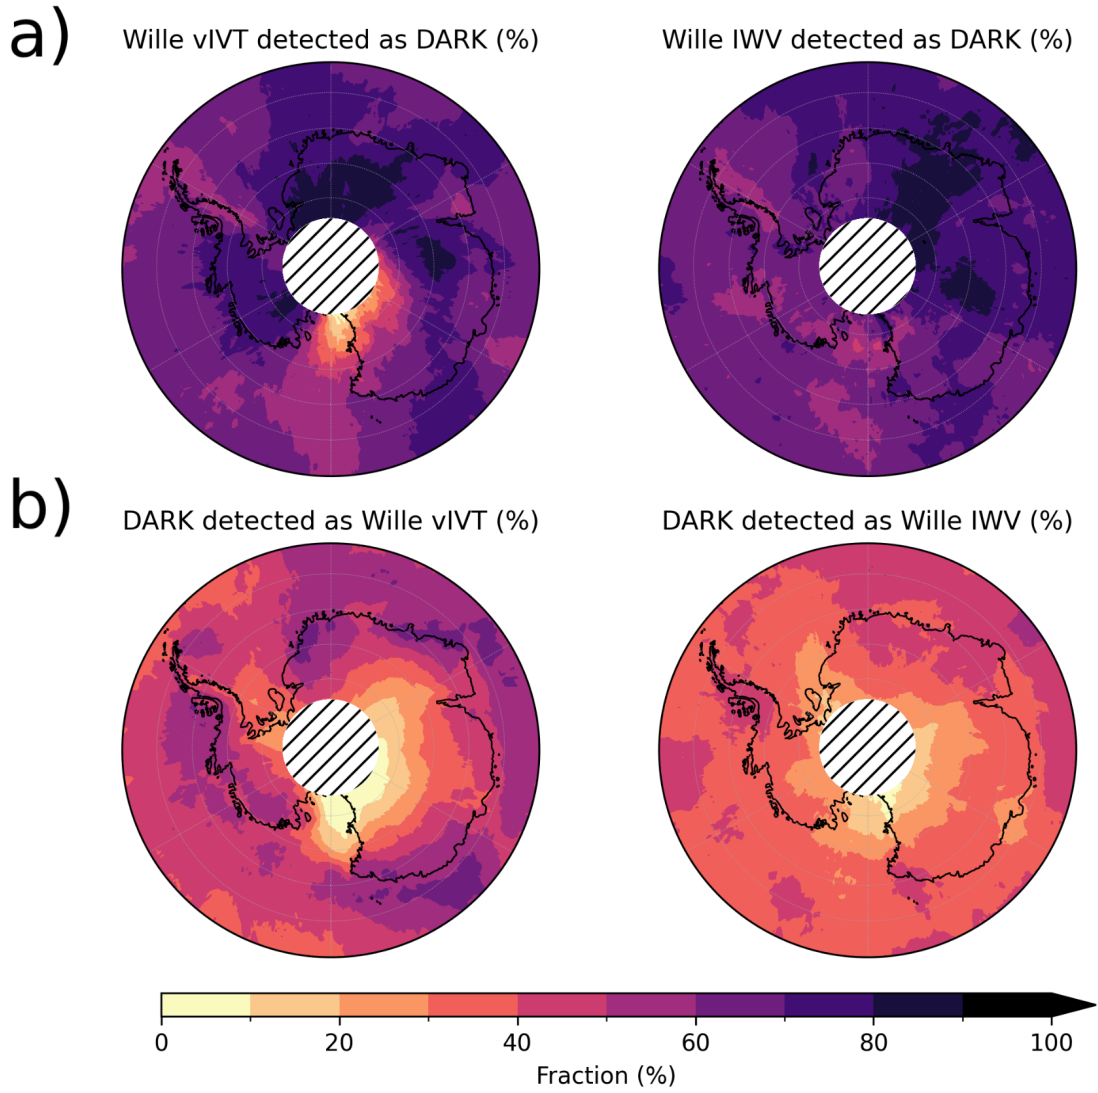

**Fig. S3.** Co-detection fractions between the DARK and Wille vIVT (left) and Wille IWV (right) catalogues. Panels show, for each grid point, the percentage of detections in one catalogue that have a corresponding detection in the other within a  $\pm 2^\circ$  latitude  $\times$   $\pm 5^\circ$  longitude neighbourhood. (a) Wille detections identified as DARK. (b) DARK detections identified as Wille. The area poleward of  $83^\circ$  S is masked (hatched) to avoid edge effects introduced by the  $\pm 2^\circ$  latitude neighbourhood near the pole.

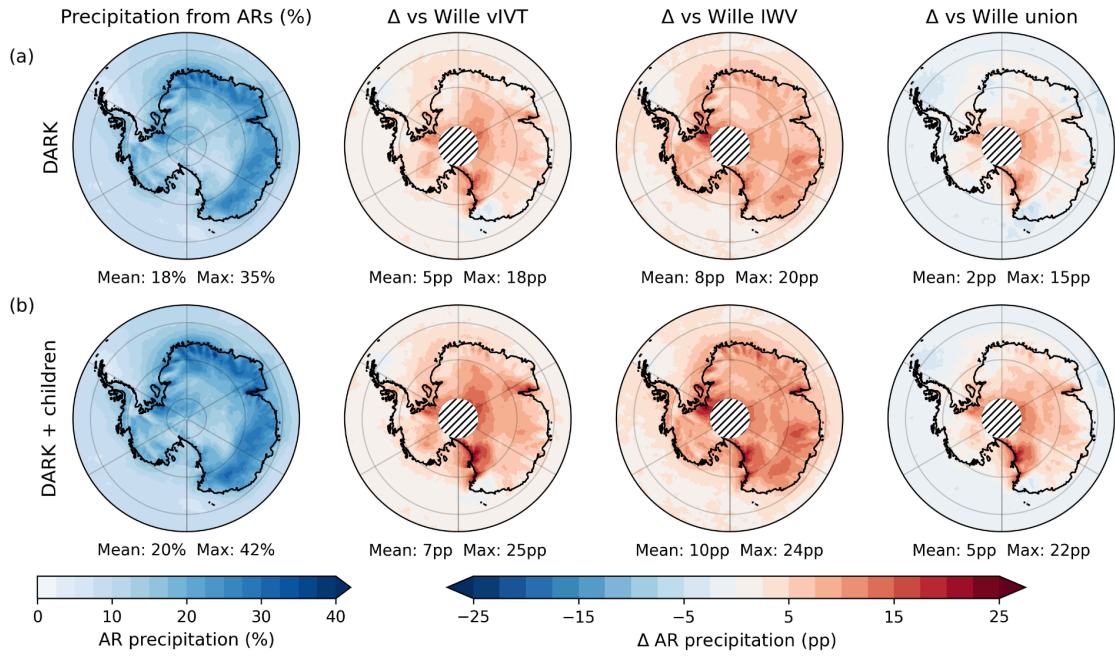

**Fig. S4.** Same as Fig. 3, with an additional column showing the difference in AR-attributed precipitation relative to the combined Wille vIVT + IWV ("Wille union") scheme. Antarctic land-only mean and maximum values are reported below each panel. Hatched white areas south of  $85^\circ$  S mark regions excluded from the Wille schemes.

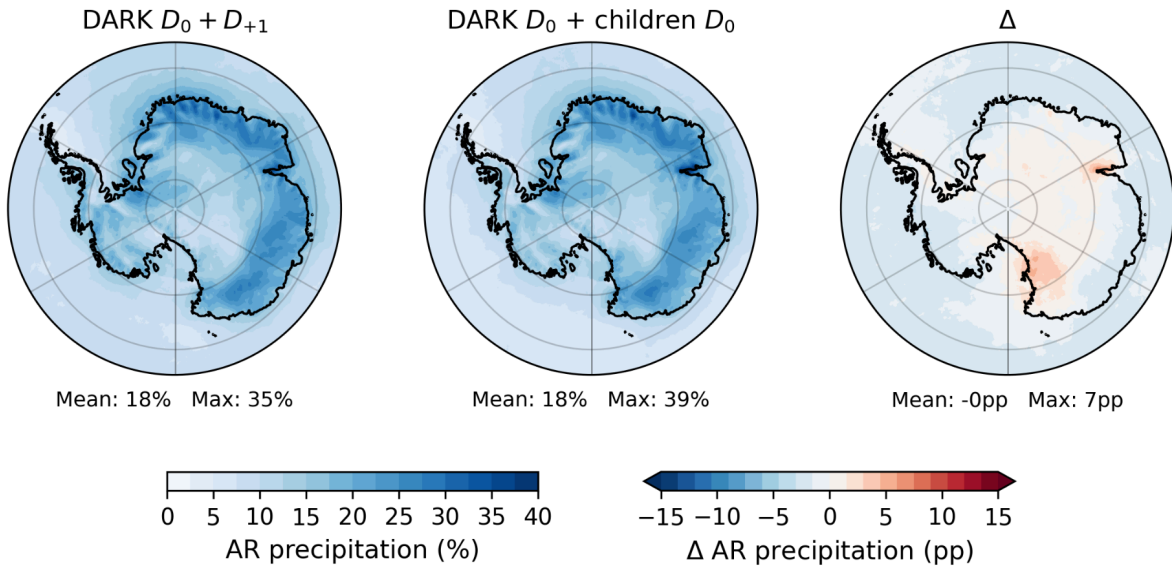

**Fig. S5.** Share of total precipitation attributed to (left) DARK ARs, including precipitation occurring on the day of landfall ( $D_0$ ) and the following day ( $D_{+1}$ ); (middle) DARK ARs and their children considering only the day of landfall ( $D_0$ ); and (right) their difference (left - middle).

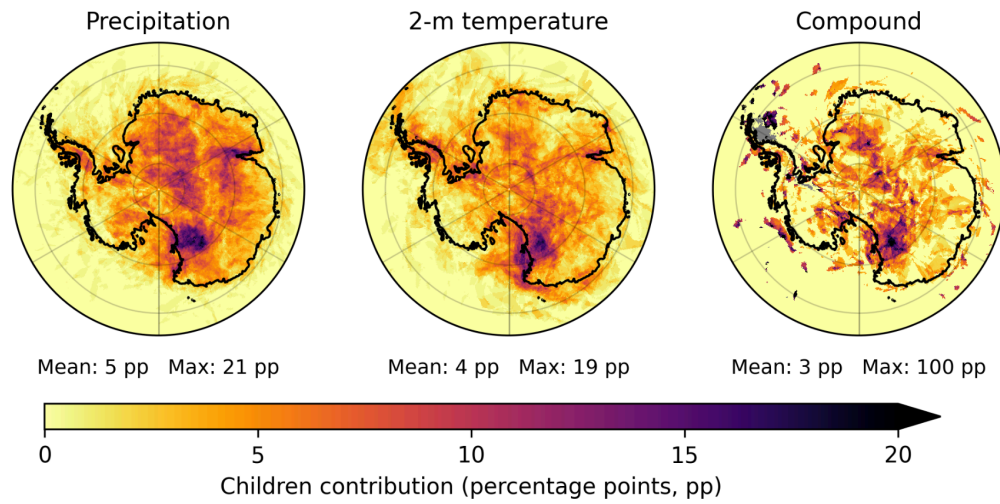

**Fig. S6.** Contribution of AR children to the fraction of 99th-percentile anomaly days associated with DARK ARs and their children (displayed in Fig. 5b, d and Fig. 6d).

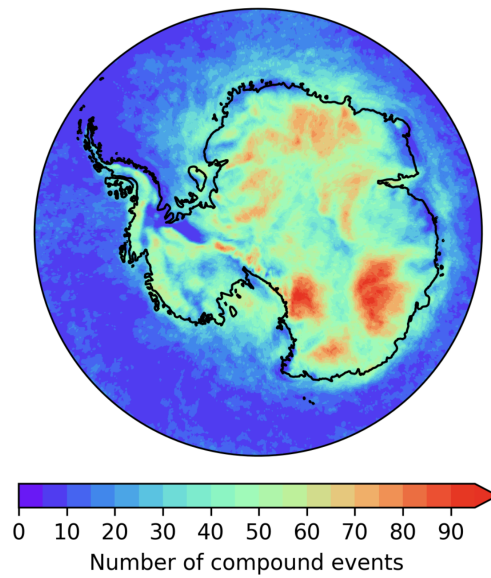

**Fig. S7.** Number of compound precipitation–temperature extreme events (Sect. 2.4) across Antarctica.
